# Supplementary material for: Ultrasonic–biogenic synthesis of silver on anodized aluminum with superior antibacterial properties
Source: Royal Society of Chemistry journal article supplement (doi:10.1039/d3ma00366c), 2023-01-01
Supplement: d3ma00366c1.pdf [file d3ma00366c1.pdf]

## **Ultrasonic-biogenic synthesis of silver on anodized aluminum with superior antibacterial properties**

Henry Agbe<sup>1\*</sup>, Dilip Kumar Sarkar<sup>2</sup>, X.-Grant Chen<sup>2</sup>, David Dodoo-Arhin<sup>3</sup>

<sup>1</sup>Department of Materials Engineering, College of Engineering, Kwame Nkrumah University of Science and Technology, PMB University Post Office, KNUST-Kumasi, Ghana

<sup>2</sup>Department of Applied Science, University of Québec at Chicoutimi, Aluminum Research Center – REGAL, Chicoutimi, QC, Canada, G7H 2B1.

<sup>3</sup> Department of Materials Science and Engineering, University of Ghana, P.O. Box LG 77, Legon-Accra, Ghana.

\*Corresponding author: [henry.agbe@knust.edu.gh](mailto:henry.agbe@knust.edu.gh)

## Supplementary Information

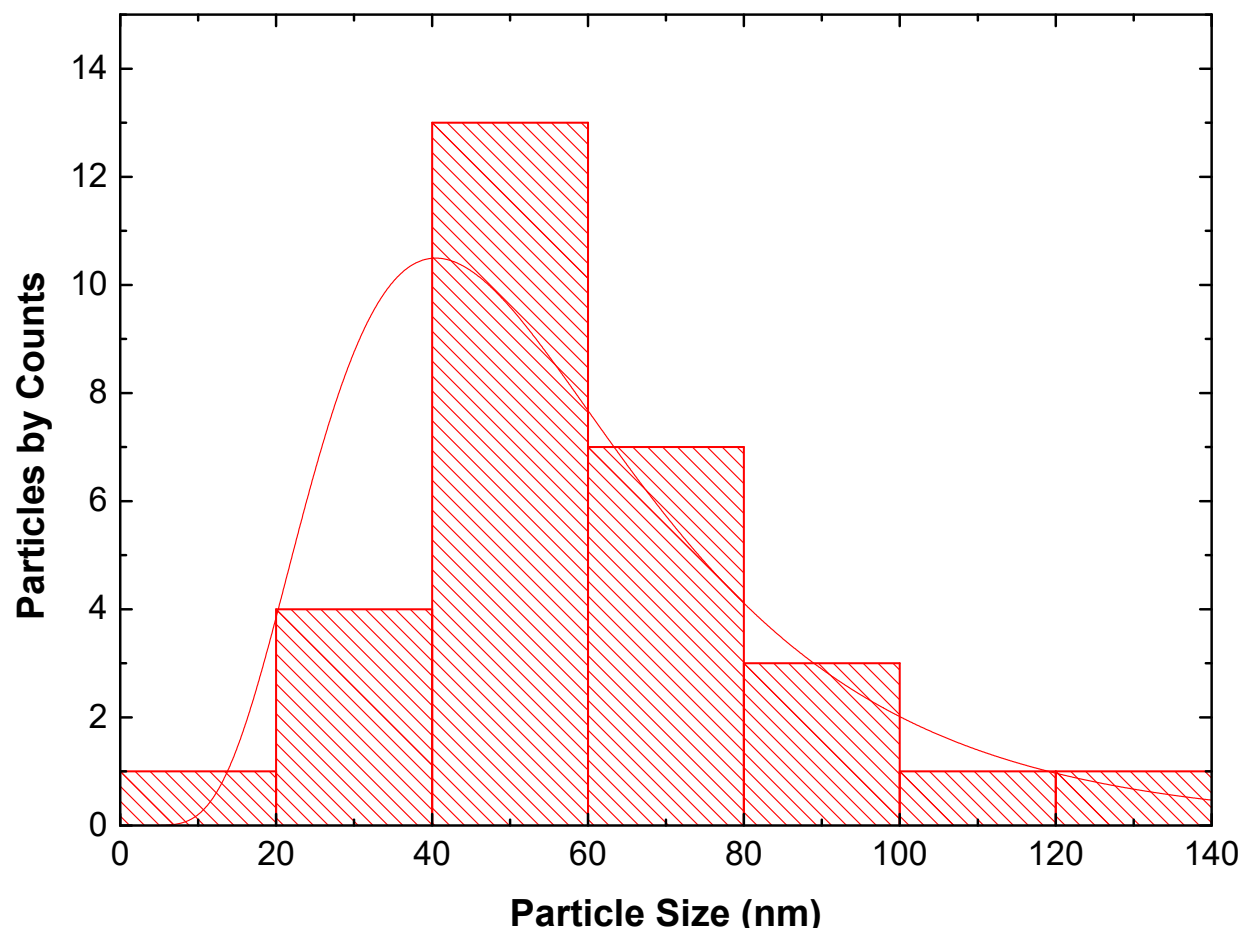

Figure S1. Particle size distribution of biogenic Ag-NPs synthesized by onion-extract.

Table S1. Antibacterial activity of silver nanoparticles from onion extract against model bacteria.

| Agent           | Mean diameter of inhibition zone (mm) |                                  |                            |
|-----------------|---------------------------------------|----------------------------------|----------------------------|
|                 | Gram-positive bacterium               | Gram-negative bacteria           |                            |
|                 | <i>S. aureus</i> (ATCC 6538)          | <i>P. aeruginosa</i> (ATCC 9027) | <i>E. coli</i> (ATCC 7839) |
| Biogenic Ag-NPs | 11.0 ± 1.0                            | 13.0 ± 1.0                       | 10.0 ± 0.9                 |
| onion extract   | 6.0 ± 0.6                             | 6.0 ± 1.0                        | 6.0 ± 0.8                  |
| Control (water) | 0                                     | 0                                | 0                          |

Table S2: Antibacterial activity of biogenic silver nanoparticles coated anodized aluminum compared with controls by dry seeding assay.

| Samples                   | % of Dead bacteria<br><i>E-Coli</i> |           |           |            |            |             |
|---------------------------|-------------------------------------|-----------|-----------|------------|------------|-------------|
|                           | Bacteria                            |           |           |            |            |             |
| <b>Contact Time (min)</b> | <b>0</b>                            | <b>15</b> | <b>60</b> | <b>120</b> | <b>240</b> | <b>1440</b> |
| Copper                    | 0                                   | 15        | 100       | 100        | 100        | 100         |
| Ag/AAO/Al                 | 0                                   | 29        | 100       | 100        | 100        | 100         |
| O.E/AAO/Al                | 0                                   | 10        | 100       | 100        | 100        | 100         |
| AAO/Al                    | 0                                   | 5         | 100       | 100        | 100        | 100         |
| Al                        | 0                                   | 0         | 12        | 17         | 31         | 65          |
